# Supplementary material for: Encapsulating third donors into D–A hybrid heterostructures to form three-component charge-transfer complexes for enhanced electrical properties
Source: Royal Society of Chemistry journal article supplement (doi:10.1039/d1dt02230j), 2021-01-01
Supplement: d1dt02230j1.pdf [file d1dt02230j1.pdf]

Supporting Information for

## Encapsulating third donors into D-A hybrid heterostructures to form three-component charge-transfer complexes for enhanced electrical properties

Meng-Hua Li<sup>a</sup>, Ming-Hua You<sup>b</sup> and Mei-Jin Lin<sup>a,c,\*</sup>

<sup>a</sup> Key Laboratory of Molecule Synthesis and Function Discovery (Fujian Province University), College of Chemistry, Fuzhou University, Fuzhou, 350108, China. E-mail: meijin\_lin@fzu.edu.cn.;

<sup>b</sup> College of Materials Science and Engineering, Fujian University of Technology, China, 350118

<sup>c</sup> Fujian Provincial Key Laboratory of Electrochemical Energy Storage Materials, Fuzhou University, Fuzhou, Fujian, 350002, China

### Table of Contents:

|                                          |    |
|------------------------------------------|----|
| 1. Crystal data and structure refinement | S1 |
| 2. Infrared spectral analyses            | S2 |
| 3. Thermo-gravimetric analyses (TG)      | S3 |
| 4. UV-Vis absorption measurements        | S4 |
| 5. Energy band gap of hybrids <b>1-3</b> | S4 |

## 1. Crystal data and structure refinement for hybrid 1-3

Table 1. Crystallographic Data and Structural Refinements Parameters for hybrid 1-3.

| hybrid                                      | 1                                                                                            | 2                                                                                            | 3                                                                                            |
|---------------------------------------------|----------------------------------------------------------------------------------------------|----------------------------------------------------------------------------------------------|----------------------------------------------------------------------------------------------|
| Empirical formula                           | C <sub>16</sub> H <sub>14</sub> Cu <sub>4</sub> I <sub>8</sub> N <sub>4</sub> S <sub>2</sub> | C <sub>32</sub> H <sub>24</sub> Cu <sub>3</sub> I <sub>5</sub> N <sub>4</sub> S <sub>2</sub> | C <sub>36</sub> H <sub>26</sub> Cu <sub>3</sub> I <sub>5</sub> N <sub>4</sub> S <sub>2</sub> |
| Formula weight                              | 1595.79                                                                                      | 1353.79                                                                                      | 1403.85                                                                                      |
| Temperature/K                               | 293(2)                                                                                       | 296.15                                                                                       | 296.15                                                                                       |
| Crystal system                              | triclinic                                                                                    | orthorhombic                                                                                 | orthorhombic                                                                                 |
| Space group                                 | <i>P</i> -1                                                                                  | <i>Pnma</i>                                                                                  | <i>Pnma</i>                                                                                  |
| <i>a</i> /Å                                 | 5.9584(3)                                                                                    | 15.4744(7)                                                                                   | 15.4877(5)                                                                                   |
| <i>b</i> /Å                                 | 11.7691(7)                                                                                   | 13.3303(5)                                                                                   | 13.3252(4)                                                                                   |
| <i>c</i> /Å                                 | 12.0851(6)                                                                                   | 17.5587(8)                                                                                   | 18.3914(7)                                                                                   |
| $\alpha$ /°                                 | 110.950(5)                                                                                   | 90                                                                                           | 90                                                                                           |
| $\beta$ /°                                  | 97.265(5)                                                                                    | 90                                                                                           | 90                                                                                           |
| $\gamma$ /°                                 | 94.237(5)                                                                                    | 90                                                                                           | 90                                                                                           |
| Volume/Å <sup>3</sup>                       | 778.57(8)                                                                                    | 3622.0(3)                                                                                    | 3795.6(2)                                                                                    |
| Z                                           | 1                                                                                            | 4                                                                                            | 4                                                                                            |
| $\rho_{\text{calc}}$ /cm <sup>3</sup>       | 3.403                                                                                        | 2.483                                                                                        | 2.457                                                                                        |
| $\mu$ /mm <sup>-1</sup>                     | 10.775                                                                                       | 6.153                                                                                        | 5.877                                                                                        |
| 2 $\theta$ range for data collection/°      | 4.148 to 59.164                                                                              | 4.64 to 50.046                                                                               | 4.6 to 50.056                                                                                |
| Reflections collected                       | 10094                                                                                        | 61691                                                                                        | 16565                                                                                        |
| Independent reflections                     | 3599                                                                                         | 3343                                                                                         | 3480                                                                                         |
| Data/restraints/parameters                  | 3599/0/155                                                                                   | 3343/0/242                                                                                   | 3480/0/267                                                                                   |
| Goodness-of-fit on $F^2$                    | 1.027                                                                                        | 1.064                                                                                        | 1.065                                                                                        |
| Final R indexes [ $I \geq 2\sigma(I)$ ]     | $R_1 = 0.0362,$<br>$wR_2 = 0.0890$                                                           | $R_1 = 0.0678,$<br>$wR_2 = 0.1499$                                                           | $R_1 = 0.0346,$<br>$wR_2 = 0.0536$                                                           |
| Final R indexes [all data]                  | $R_1 = 0.0500,$<br>$wR_2 = 0.0946$                                                           | $R_1 = 0.0776,$<br>$wR_2 = 0.1572$                                                           | $R_1 = 0.0505,$<br>$wR_2 = 0.0599$                                                           |
| Largest diff. peak/hole / e Å <sup>-3</sup> | 1.92/-1.78                                                                                   | 5.46/-4.10                                                                                   | 1.19/-1.26                                                                                   |

## 2 Infrared spectral analyses

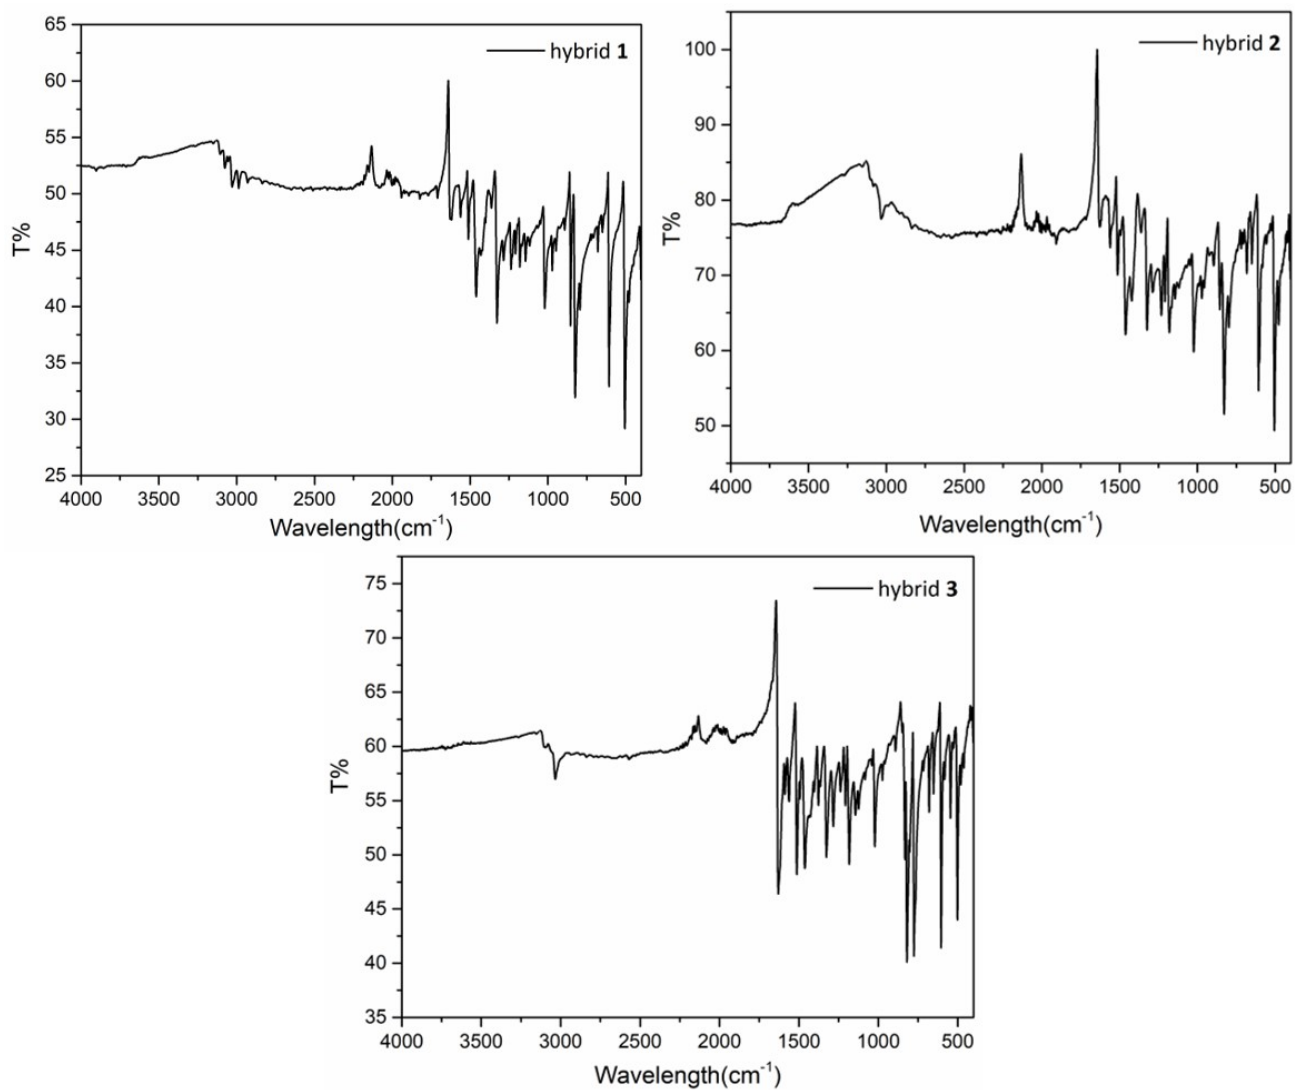

**Figure S1.** Infrared spectra of hybrids 1-3.

### 3. Thermo-gravimetric analyses (TG)

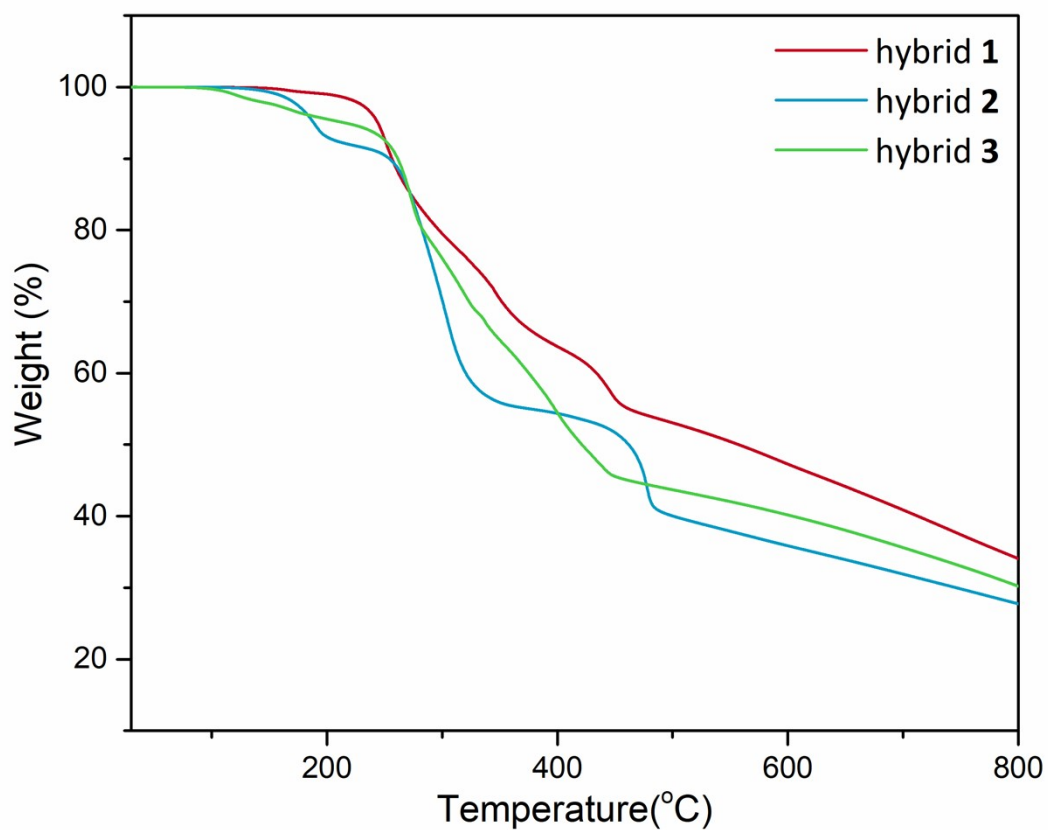

**Figure S2.** The TG curves of hybrids 1-3 under N<sub>2</sub> atmosphere with a heating rate of 10 °C/min.

#### 4. UV-Vis absorption measurements

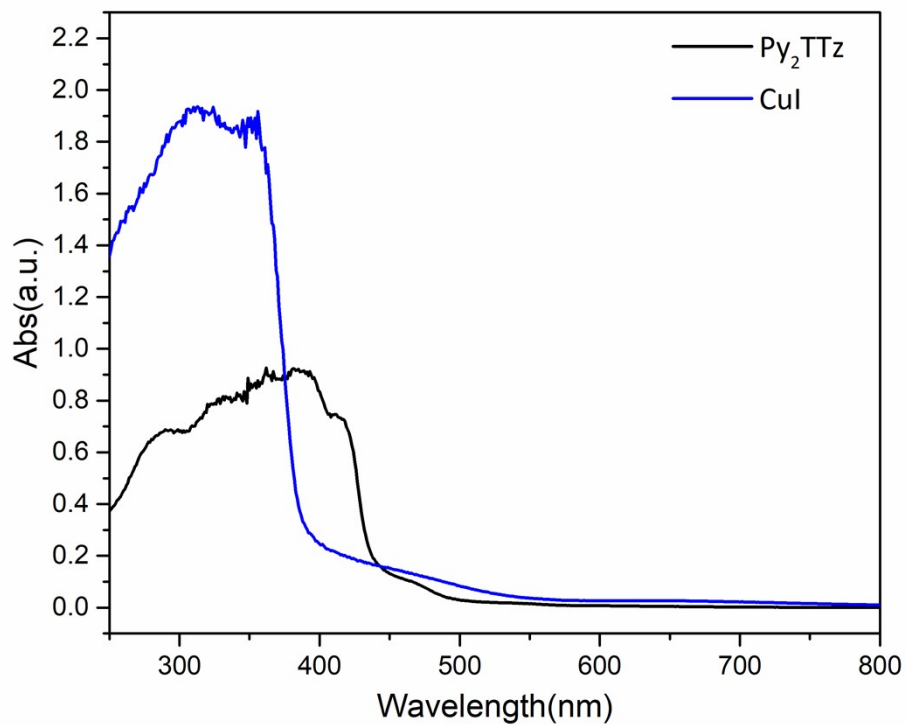

Figure S3. The UV-Vis absorption of CuI and Py<sub>2</sub>TTz.

#### 5. Energy band gap of hybrids 1-3.

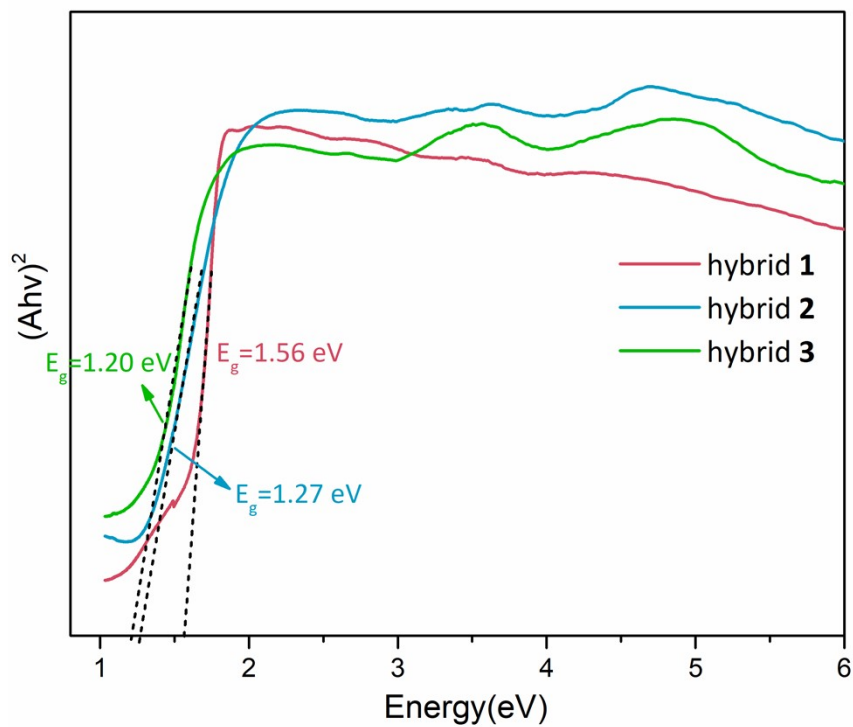

Figure S4. The energy band gap of hybrids 1-3.
